# Supplementary material for: Molecular landscape of ERBB2 alterations in 3000 advanced NSCLC patients
Source: PubMed Central journal article supplement — NPJ Precis Oncol. 2024 Oct 1;8:217. doi: 10.1038/s41698-024-00720-9 (PMC11445497; doi:10.1038/s41698-024-00720-9), 2024-10-01
Supplement: 41698_2024_720_MOESM1_ESM.pdf [file 41698_2024_720_MOESM1_ESM.pdf]

## Supplementary Information

Molecular landscape of *ERBB2* alterations in 3,000 advanced NSCLC patients

Hong, et al

### **Contents**

Supplementary Figures. 1-4

Supplementary Table 1

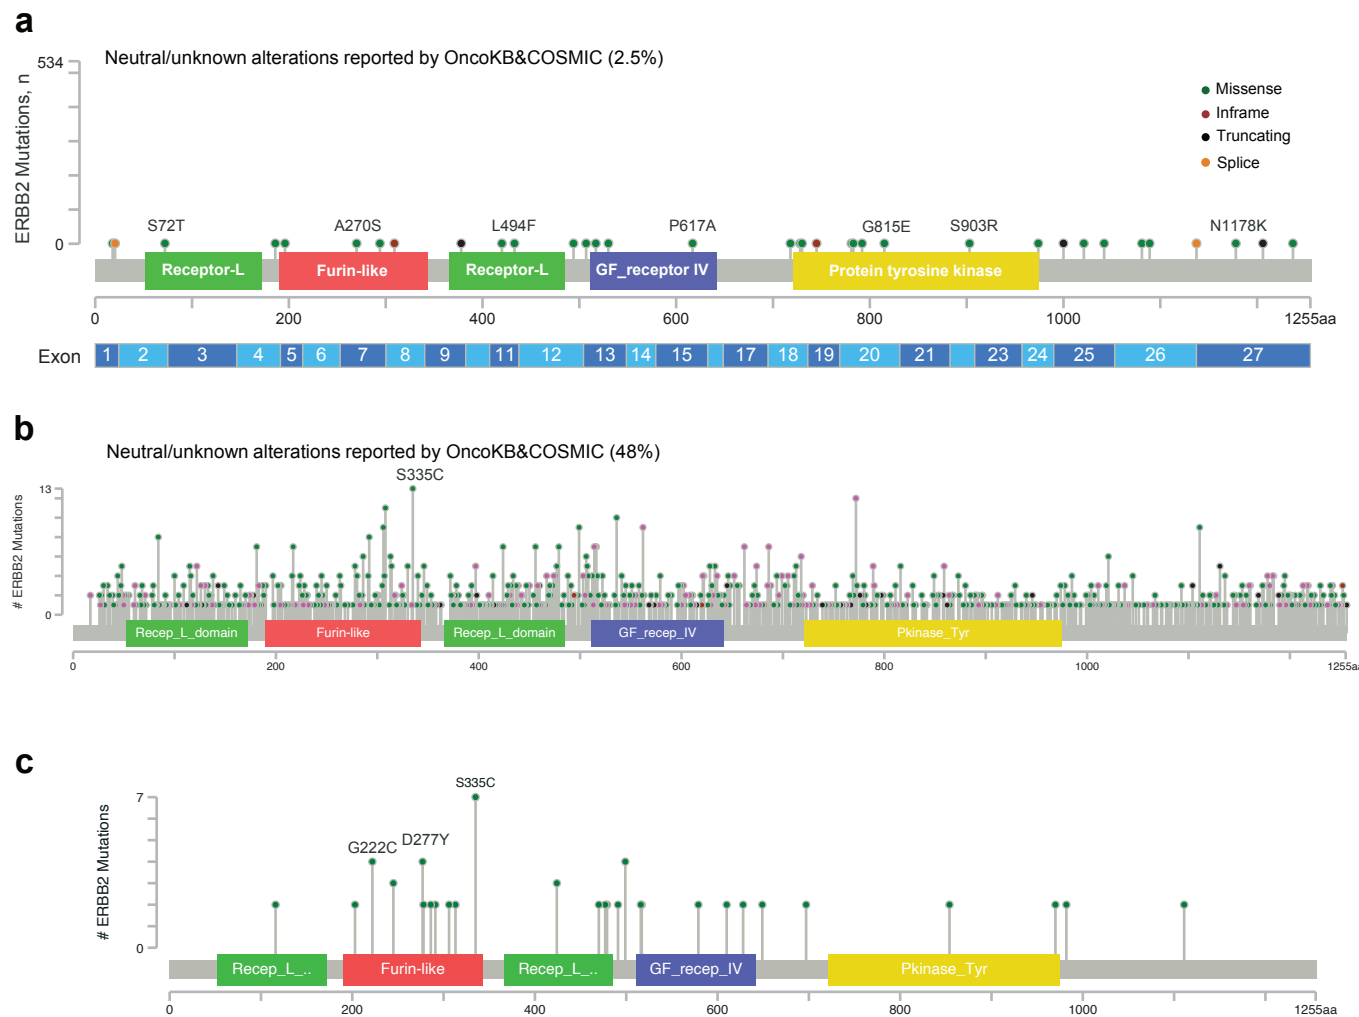

Supplementary Figure 1. **Neutral/unknown *ERBB2* alterations based on OncoKB and COSMIC.** **a.** Genepilus cohort. **b.** Guardant360 cohort. **c.** Variants of unknown significance (VUS) having repeated occurrence and functioning as dominant clone in Guardant360 cohort.

**a**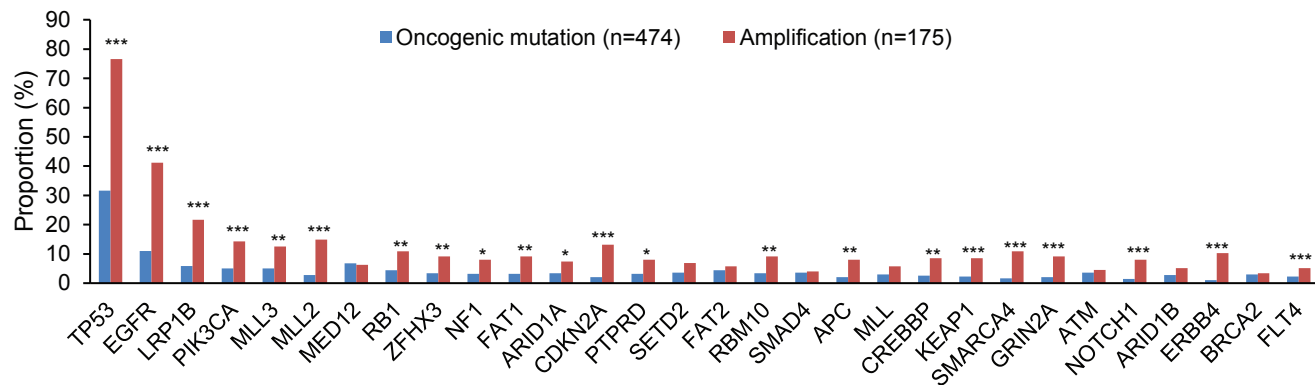**b**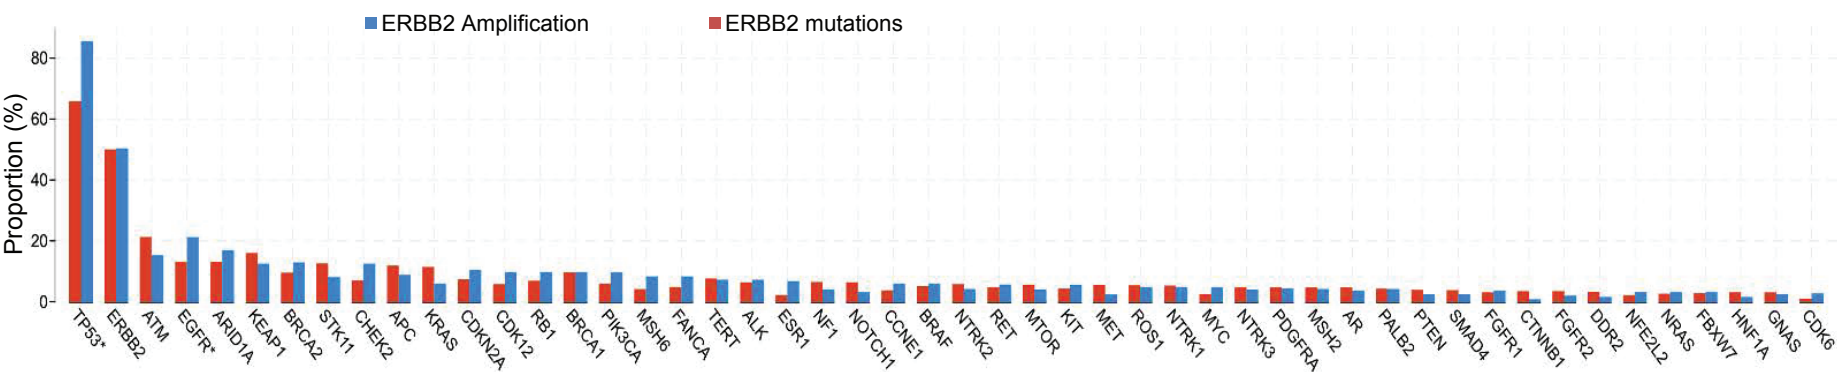

Supplementary Figure 2. **Differential upregulated genes in patients with *ERBB2* amplifications compared to those with *ERBB2* oncogenic mutations.** a. Geneplus. b. Guardant360. \*  $p < 0.05$ ; \*\*  $p < 0.01$ ; \*\*\*  $p < 0.001$

**a**

Dominant clone (oncogenic *ERBB2*/*EGFR* mutation)

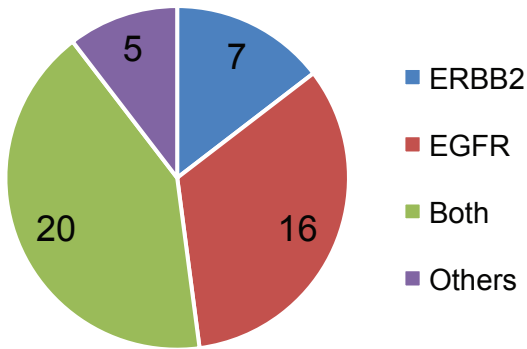**b**

Dominant *ERBB2* clone

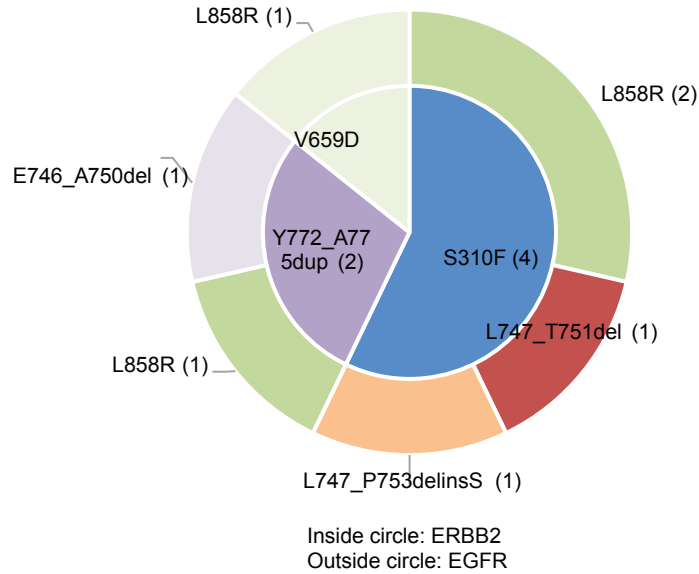**c**

Dominant *EGFR* clone

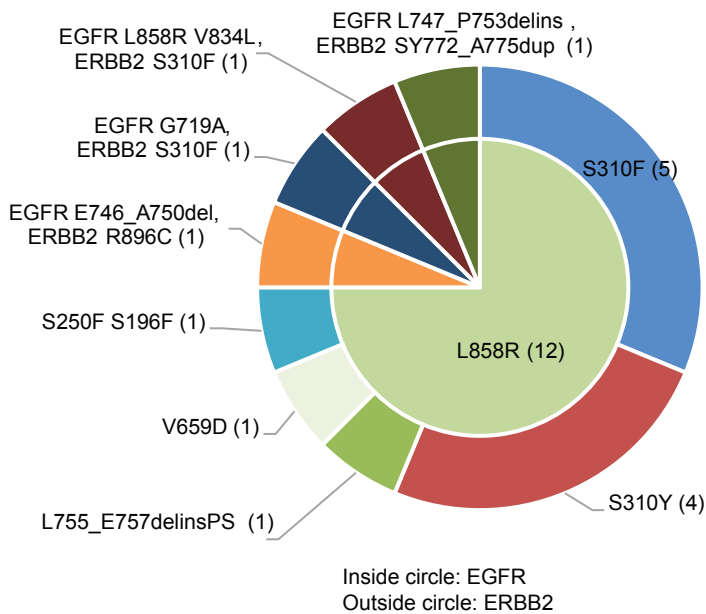**d**

Dominant *ERBB2* and *EGFR* clone

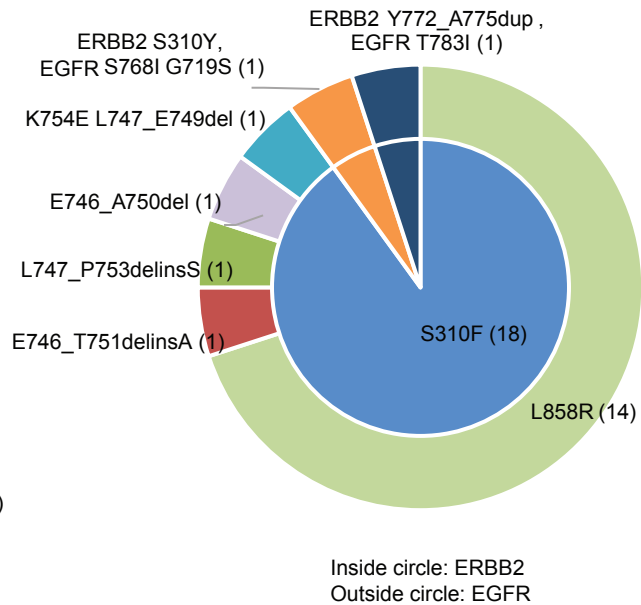

Supplementary Figure 3. **Clonality relationship between *ERBB2* and *EGFR* when co-occurring in NSCLC in Geneplus cohort.** **a.** Dominant clone (oncogenic *ERBB2*/*EGFR* mutation); **b.** Dominant *ERBB2* clone; **c.** Dominant *EGFR* clone; **d.** Dominant clone in both *ERBB2* and *EGFR*.

**a**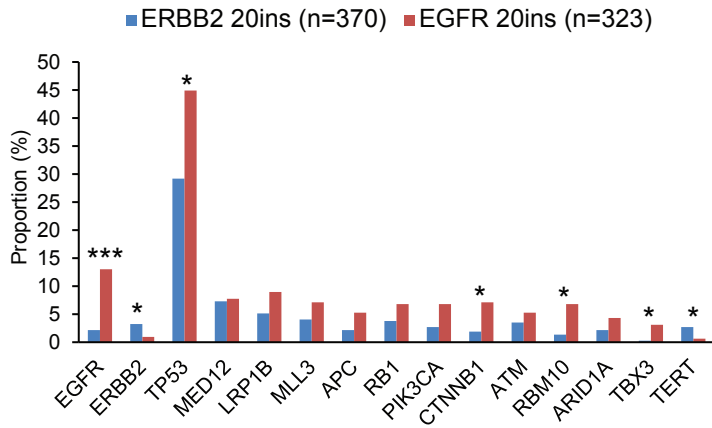**b**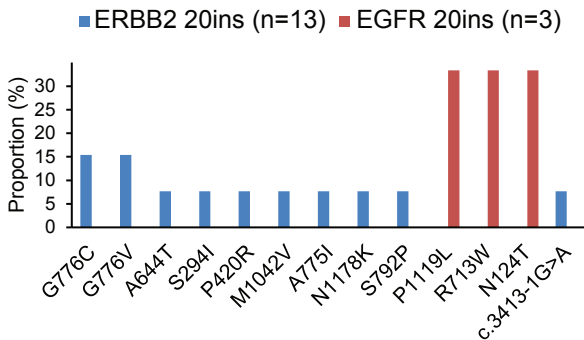**c**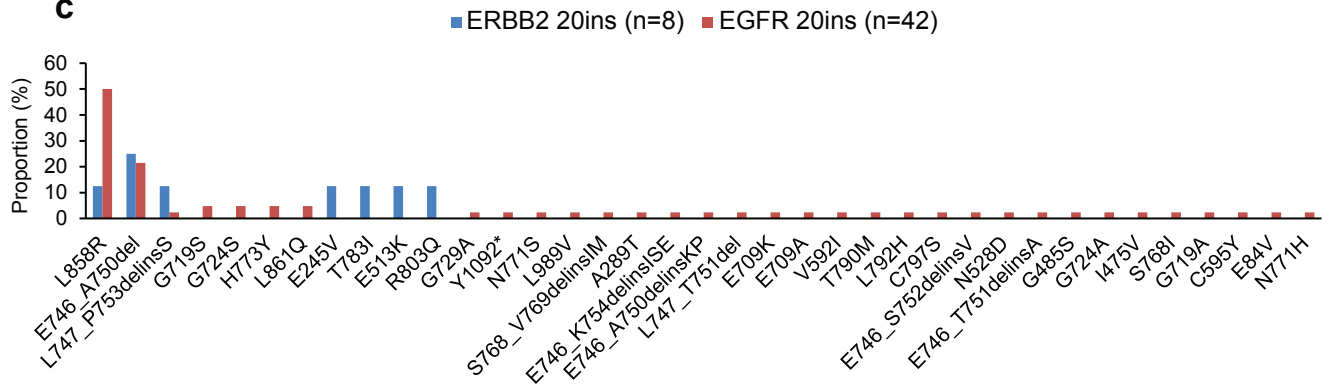

Supplementary Figure 4. **Comparison of co-occurring gene mutations in patients with *ERBB2* or *EGFR* exon 20 insertion (ex20 ins) in Geneplus cohort.** **a.** Bar plot showing the proportion of co-occurring gene difference between two groups. **b.** Concomitant *ERBB2* alterations with *ERBB2* ex20 ins or with *EGFR* ex20 ins. **c.** Concomitant *EGFR* alterations with *ERBB2* ex20 ins or with *EGFR* ex20 ins. \*  $p < 0.05$ ; \*\*\*  $p < 0.001$

Supplementary Table 1. Clinical features of patients with *ERBB2* somatic mutations and *ERBB2* amplifications detected by the 1021 gene panel in Geneplus cohort

| Characteristics          | n = 663       |
|--------------------------|---------------|
| Age, years               |               |
| Mean (SD)                | 56.3 (12.7)   |
| Median (min-max)         | 57 (21-89)    |
| Gender, n (%)            |               |
| Male                     | 290 (43.7)    |
| Female                   | 373 (56.3)    |
| Smoking, n (%)           |               |
| Never                    | 286 (70.3)    |
| Ever                     | 121 (29.7)    |
| Unknown                  | 256 (100)     |
| Tumor stage, n (%)       |               |
| I                        | 39 (17.6)     |
| II                       | 14 (6.3)      |
| III                      | 28 (12.7)     |
| IV                       | 140 (63.4)    |
| Unknown                  | 442 (100)     |
| Histology, n (%)         |               |
| Adenocarcinoma           | 548 (94.3)    |
| Squamous cell carcinoma  | 27 (4.6)      |
| Adenosquamous carcinoma  | 4 (0.7)       |
| Sarcomatoid carcinoma    | 1 (0.2)       |
| Neuroendocrine neoplasms | 1 (0.2)       |
| Unknown                  | 82 (100)      |
| Sample type, n (%)       |               |
| Tissue                   | 606 (91.4)    |
| Blood                    | 45 (6.8)      |
| Pleura effusion          | 10 (1.5)      |
| Others                   | 2 (0.3)       |
| PD-L1 test, n (%)        |               |
| Yes                      | 144 (21.7)    |
| No                       | 519 (78.3)    |
| TPS<1%                   | 88 (61.1)     |
| TPS,1%-50%               | 45 (31.3)     |
| TPS≥50%                  | 11 (7.6)      |
| TMB test, n (%)          |               |
| Yes                      | 625 (94.3)    |
| No                       | 38 (5.7)      |
| Mean (SD)                | 5.1 (6.9)     |
| Median (min-max)         | 2.88 (0-68.0) |
